1 **Genomic diversity and molecular epidemiology of a multidrug resistant *Pseudomonas***  
2 ***aeruginosa* DMC30b isolated from hospitalized burn patient in Bangladesh**

3 M. Nazmul Hoque<sup>1</sup>, M. Ishrat Jahan<sup>2</sup>, M. Anwar Hossain<sup>2,#</sup> and Munawar Sultana<sup>2,\*</sup>

4 <sup>1</sup>Department of Gynaecology, Obstetrics and Reproductive Health, Bangabandhu Sheikh Mujibur  
5 Rahman Agricultural University, Gazipur-1706, Bangladesh

6 <sup>2</sup>Department of Microbiology, University of Dhaka, Dhaka-1000, Bangladesh

7 #Present address: Jashore University of Science and Technology, Jashore -7408, Bangladesh

8

9

10

11

12 \*Corresponding author. E-mail: munawar@du.ac.bd

13

14

15

16

17

18 **Short title: Multidrug resistant *Pseudomonas aeruginosa* DMC30b isolated from**  
19 **hospitalized burn patient**

20

21

22

23

24

25

26

27 **Abstract**

28 **Objectives:** *Pseudomonas aeruginosa* is a key opportunistic pathogen causing a wide range of  
29 community- and hospital-acquired infections in immunocompromised or catheterized patients.  
30 Here, we report the complete genome sequence of a multidrug resistant (MDR) *P. aeruginosa*  
31 DMC30b in order to elucidate the genetic diversity, molecular epidemiology, and underlying  
32 mechanisms for antimicrobial resistance and virulence.

33 **Methods:** *P. aeruginosa* DMC30b was isolated from septic wound swab of a severe burn  
34 patient. Whole-genome sequencing (WGS) was performed under Ion Torrent platform. The  
35 genome was annotated using the SPAdes v. 3.12.01 in an integrated Genome Analysis Platform  
36 (IonGAP) for Ion Torrent sequence data. The genome was annotated using the NCBI  
37 Prokaryotic Genome Annotation Pipeline (PGAP). *In-silico* predictions of antimicrobial  
38 resistance genes (ARGs), virulence factor genes (VFGs) and metabolic functional potentials  
39 were performed using different curated bioinformatics tools.

40 **Results:** *P. aeruginosa* DMC30b was classified as MDR and belongs to sequence type 244  
41 (ST244). The complete genome size is 6,994,756 bp with a coverage of 76.76x, G+C content  
42 of 65.7% and a BUSCO (Benchmarking Universal Single-Copy Orthologs) score of 100. The  
43 genome of *P. aeruginosa* DMC30b harboured two plasmids (e.g., IncP-6 plasmid p10265-  
44 KPC; 78,007 bp and ColRNAI\_pkOIIISD1; 9,359 bp), 35 resistomes (ARGs) conferring  
45 resistance to 18 different antibiotics (including four beta-lactam classes), and 214 VFGs. It was  
46 identified as the 167<sup>th</sup> ST244 strain among ~ 5,800 whole-genome sequences of *P. aeruginosa*  
47 available in the NCBI database.

48 **Conclusion:** *P. aeruginosa* DMC30b belongs to ST244 and was identified as the 167<sup>th</sup> such  
49 isolate to be submitted to NCBI, and the first complete ST244 genome from Bangladesh. The  
50 complete genome data with high genetic diversity and underlying mechanisms for  
51 antimicrobial resistance and virulence of *P. aeruginosa* DMC30b (ST244) will aid in

52 understanding the evolution and phylogeny of such high-risk clones and provide a solid basis  
53 for further research on MDR or extensively drug resistant strains.

54 **Keywords:** Human, Burn, *P. aeruginosa*, Pathogenic, Multidrug Resistance, Virulence

55

## 56 **1. Background**

57 *Pseudomonas aeruginosa* is an opportunistic Gram-negative, non-fermenting bacterial  
58 pathogen that causes a wide array of life-threatening, acute and chronic infections in  
59 hospitalized and immunocompromised patients, especially in the intensive care unit (ICU) [1,  
60 2]. It is well established that bacterial proliferation in wounds contributes to infection and  
61 delayed wound healing [3]. The microenvironment of chronic wound is ideal for bioburden  
62 and usually contains multiple bacterial species [4, 5]. *P. aeruginosa* is one of the most common  
63 bacteria isolated from chronic wounds [6], and is highly prevalent in chronic wounds, estimated  
64 to be present in about 25% of all cases [7]. Infections caused by *P. aeruginosa* are usually  
65 difficult to treat and persistent due to the characteristic high frequency of emergence of MDR  
66 or extensively drug-resistant (XDR) strains [8-10]. The World Health Organization and Centers  
67 for Disease Control and Prevention have both designated *P. aeruginosa* as one of the major  
68 (critical) pathogens for which new antibiotics are desperately needed [11, 12]. Moreover, *P.*  
69 *aeruginosa* is a persistent and difficult-to-treat pathogen in many patients, and possesses a  
70 versatile arsenal of antimicrobial resistance determinants and virulence factors that enable  
71 survival, adaptation, and consequent persistence within the complex milieu of infections [13].  
72 The increasingly frequent infections caused by MDR and XDR strains with limited therapeutic  
73 options are associated with high morbidity and mortality worldwide [13, 14]. Particularly the  
74 emergence of MDR and XDR strains due to bacterial expression of resistance genes such as  $\beta$ -  
75 lactamases, 16S rRNA methylases, and carbapenemases in recent years leading to severe  
76 infections with serious global threats to human health, emphasizing the need for novel

77 (antibiotics-independent) treatment strategies. The most troublesome acquired resistance of *P.*  
78 *aeruginosa* is the production of carbapenemases, which confer resistance to most commercially  
79 available  $\beta$ -lactams [9]. The presence of these carbapenemases in high-risk clones and  
80 sequence types (STs) on complete genome or plasmid or the chromosome of *P. aeruginosa*,  
81 may be the cause of its successful dissemination in Bangladesh and beyond. Recent molecular  
82 and genomic studies reported that most of the infectious and virulent clones of *P. aeruginosa*  
83 belonged to ST235, ST244, ST308, ST1006, and ST1060 [15-17].

84         Recently, an increasing prevalence of MDR and XDR *P. aeruginosa* strains, with rates  
85 of between 15% and 30% in some geographical areas have been reported [18, 19]. Microbial  
86 and host factors furthermore impact the ongoing adaptive response exhibited by MDR, XDR  
87 and mutating strains of *P. aeruginosa* in immunocompromised and hospitalized patients.  
88 Furthermore, acquisition of advantageous attributes such as virulence factor assembly,  
89 motility, antibiotic resistance, and metabolic adaptation of the strains are the major contributors  
90 to morbidity and mortality [13]. Several molecular and typing methods have been used to study  
91 the evolution and genetic heterogeneity of *P. aeruginosa* because it is characterized by high  
92 genetic diversity [15, 20, 21]. In recent years, whole genome sequencing (WGS) and RNAseq  
93 analysis has enabled the study of isolates collected sequentially from patients and the  
94 characterization of the molecular epidemiology and evolutionary patterns and/or trajectories  
95 that comprise the hallmark complexity of diverse subclones of *P. aeruginosa* in clinically  
96 infected patients [15, 20, 22]. The study of molecular epidemiology and genetic diversity in  
97 MDR *P. aeruginosa* that harbour genes conferring resistance to a wide range of antibiotics and  
98 virulence factors, is key to understand the role in the dissemination of such resistance  
99 determinants among clinical and environmental isolates [2, 15]. The International  
100 *Pseudomonas aeruginosa* Consortium was formed with the aim of genome sequencing >1000  
101 *P. aeruginosa* genomes and constructing an analysis pipeline for the study of *P. aeruginosa*

102 evolution, virulence and antibiotic resistance [23]. Genomics data of this consortium will  
103 support molecular epidemiology for the surveillance of outbreaks and has the potential for  
104 future genotypic antimicrobial susceptibility testing as well as the identification of novel  
105 therapeutic targets and prognostic markers [24]. Herein this article, we describe the  
106 epidemiological distribution, host range, genomic diversities, ARGs and virulence factors  
107 found in an MDR *P. aeruginosa* DMC30b isolated from septic wound swab of a severely burn  
108 patient hospitalized in the Dhaka Medical College (DMC), Bangladesh. To elucidate the  
109 genetic diversity, molecular epidemiology, and underlying mechanisms for antimicrobial  
110 resistance and virulence of *P. aeruginosa* DMC30b, high throughput WGS and downstream  
111 bioinformatic analysis were performed.

## 112 **2. Materials and Methods**

### 113 **2.1. Ethics statement**

114 The study was approved by the Ethical Review Committee (ERC), Faculty of  
115 Biological Sciences, University of Dhaka, Bangladesh (reference 64/Biol.Sc./2018–2019) and  
116 carried out under the direct supervision of the laboratory biosafety officer. As the samples were  
117 collected from Dhaka Medical College Hospital, we did not handle the human subjects directly.

### 118 **2.2. Isolate retrieval and antimicrobial susceptibility tests**

119 *P. aeruginosa* DMC30b, previously isolated from septic wound swab of a severe burn patient  
120 [9], was retrieved and screened for antimicrobial susceptibility tests, genomic diversity and  
121 molecular epidemiological analysis. The isolate was plated onto the Mueller Hinton agar  
122 (MHA) (Oxoid, England), and incubated at 37 °C for 18-24 h followed by retrieval of pure  
123 colonies. The isolate was tested against a series of antibiotics recommended in the Clinical and  
124 Laboratory Standards Institute (CLSI) document M1007 [25] using the Kirby–Bauer method.  
125 Twenty antibiotics of 11 antibiotic groups were tested: imipenem (10 mg), meropenem (10  
126 mg), doripenem (10 mg), chloramphenicol (30 mg), ampicillin (10 mg), doxycycline (30 mg),

127 nitrofurantoin (300 mg), gentamicin (10 mg), trimethoprim (5 mg), tetracycline (30 mg),  
128 cefalexin (first generation; 30 mg), cefuroxime (second generation; 30 mg), cefotaxime (third  
129 generation; 30 mg), cefepime (fourth generation; 30 mg), nalidixic acid (first generation; 30  
130 mg), ciprofloxacin (second generation; 5 mg), levofloxacin (third generation; 5 mg), aztreonam  
131 (30 mg), polymyxin B (10 mg) and colistin (10 mg). MIC<sub>90s</sub> of imipenem, meropenem,  
132 ciprofloxacin, chloramphenicol, ceftriaxone, erythromycin and tetracycline were determined  
133 by broth microdilution using 2-fold dilution in the range 2–512 mg/L under incubation at 37  
134 °C.

### 135 **2.3 DNA extraction and whole genome sequencing for *P. aeruginosa* DMC30b**

136 The genomic DNA from *P. aeruginosa* DMC30b was extracted from overnight culture  
137 by boiled DNA extraction method [26] using commercial DNA extraction kit, QIAamp DNA  
138 Mini Kit (QIAGEN, Hilden, Germany). The quality and quantity of the extracted DNA were  
139 measured using a NanoDrop ND-2000 spectrophotometer (Thermo Fisher Scientific, Waltham,  
140 MA 02451, USA). DNA extracts with A260/280 and A260/230 ratios of ~ 1.80 and 2.00 to  
141 2.20, respectively, were considered as high-purity DNA sample. Finally, the harvested DNA  
142 was visualized on 1% (w/v) agarose gel, and sent for DNA sequencing based on their high  
143 purity and adequate concentration.

144 The whole genome sequencing (WGS) was done under Ion Torrent platform using 400  
145 bp read chemistry [27]. The sequence reactions were performed using the BigDye terminator  
146 cycle sequencing kit v3.1 (Applied Biosystems), purified using the BigDye XTerminator  
147 purification kit (Applied Biosystems), and then loaded onto a SeqStudio genetic analyzer  
148 capillary sequencer (Applied Biosystems) according to the manufacturer's instructions.

### 149 **2.4 Genome analysis of *P. aeruginosa* strain DMC30b**

150 The Ion Torrent platform generated FASTQ reads quality was initially assessed by the  
151 FastQC tool [28] followed by trimming of low-quality sequences using the Trimmomatic [29],

152 while the quality cut off value was Phred-20 [30, 31]. Trimmed reads were assembled de novo  
153 using SPAdes v. 3.12.1 [32] in an integrated Genome Analysis Platform (IonGAP) for Ion  
154 Torrent sequence data (<http://iongap.hpc.iter.es/iongap/newproject>). Coverage of the genomes  
155 ranged from 76.76x. The circular visualization of the *P. aeruginosa* DMC30b genome was  
156 performed using CGViewer [33]. *P. aeruginosa* DMC30b genome was compared with two  
157 reference strains; *P. aeruginosa* LESB58 (NCBI sequence accession number NC\_011770.1)  
158 [34], and *P. aeruginosa* K34-7 (NCBI sequence accession number NZ\_CP029707.1) [35]  
159 genomes. KmerFinder 3.1 [36] and PathogenFinder 1.1 [37] opensource tools were utilized to  
160 identify the species (i.e., *P. aeruginosa*) and pathogenicity of the isolate (DMC30b).

161 The annotated WGS data were used for sequence typing, antibiotic resistance genes  
162 (ARGs) prediction, virulence factor genes (VFGs) profiling, plasmids identification, and  
163 metabolic functional analysis. PROKKAAnnotation v.3.2.1 [38] was used to predict the  
164 function and identification of assembled sequences against nucleotide and protein sequence  
165 database. BUSCO (Benchmarking Universal Single-Copy Orthologs) v.4.1.2 with  
166 ‘bacteria\_odb10’ data set was used to measure the completeness of the genome [10]. The  
167 genetic relatedness of the predicted sequence types, core genome MLST analysis (cgMLST)  
168 and bacterial source tracking of the *P. aeruginosa* DMC30b and all of the 166 ST244 *P.*  
169 *aeruginosa* isolates currently deposited in NCBI GenBank database were performed using  
170 BacWGSTdb 2.0 server [39]. The Comprehensive Antibiotic Resistance Database (CARD)  
171 [40], and VirulenceFinder [41, 42] databases were used to detect ARGs and VFGs,  
172 respectively. The CARD (<https://card.mcmaster.ca>) integrated within AMR++ pipeline  
173 identified the respective genes or protein families coding for the ARGs markers in the *P.*  
174 *aeruginosa* DMC30b strain [40]. We utilized SnapGene Viewer web tool  
175 (<https://www.snapgene.com/snapgene-viewer/>) to visualize the virulence plasmid of the *P.*  
176 *aeruginosa* DMC30b. Annotation of the genome was also performed with RAST (Rapid

177 Annotation using Subsystems Technology) server (<http://rast.nmpdr.org/>) to detect the  
178 genomic functional features [43] to detect the genomic functional features.

### 179 **3. Results and Discussion**

180 The KmerFinder 3.1 detected the DMC30b isolate as *P. aeruginosa* DMC30b, while  
181 the pathogenicity of the isolate was confirmed (0.973 out of 1.00, close to the pick value  
182 indicating higher pathogenicity) by PathogenFinder 1.1. The de novo genome assembly  
183 revealed that the *P. aeruginosa* DMC30b genome was 6,994,756 bp with a coverage of 76.76x.  
184 The draft genome had 4,595,555 reads assigning for G+C content of 65.7% (Table 1). Analysis  
185 of RAST annotated genome using CG view produced a circular genome map illustrating the  
186 GC content, tRNA, rRNA, CDS, and contigs (Fig. 1). The genome of *P. aeruginosa* DMC30b  
187 possessed 474 contigs including N50 contig 56,583 bp, L50 contig 35 bp, and two plasmids.  
188 Of the detected contigs, the longest and shortest contig size were 252,681 bp and 202 bp,  
189 respectively. Notably, preliminary sequence analysis revealed 44 insertion sequences (ISs), 21  
190 predicated genomic islands (GIs), six prophage-related sequences and two CRISPR arrays. The  
191 genome of *P. aeruginosa* DMC30b encodes for 7,036 genes (Table 1). A physical genome map  
192 of *P. aeruginosa* DMC30b in comparison to two other reference strain *P. aeruginosa* LESB58  
193 and *P. aeruginosa* K34-7 is shown in Fig. 1. PROKKA annotated genome using PATRIC  
194 produced a circular genome map (Fig. 2), which identified various gene features, 6,685 protein  
195 coding sequences (CDSs), 67 RNAs including 4 rRNAs (5S = 1, 16S = 1, 23S = 2), 59 tRNAs,  
196 4 ncRNAs, and 285 pseudogenes. The protein features consist of 3,060 hypothetical proteins,  
197 2,379 functional assignments, and 1,421 GO (gene ontology) assignments. Genome  
198 completeness analysis with BUSCO showed the presence of 100% complete BUSCOs in the  
199 hybrid assembly.

200 The diverse and dynamic genetic composition of *P. aeruginosa* enables this bacterium  
201 to colonise various environments, including humans where it can cause opportunistic infections



202 [44]. The genomic features of the *P. aeruginosa* DMC30b genome described in this study is  
203 corroborated with the genome composition of different *P. aeruginosa* strains reported  
204 previously from other countries [34, 35, 45]. For instance, the complete genome of *P.*  
205 *aeruginosa* DMC30b showed 100% identity with two previously reported human originated  
206 strains; *P. aeruginosa* LESB58 and *P. aeruginosa* K34-7. The prevalence of MDR or  
207 extensively drug resistant strains of *P. aeruginosa* reduces treatment options, significantly  
208 increasing morbidity rates. *P. aeruginosa* LESB58, a so-called “Liverpool epidemic strain,”  
209 was found to be highly transmissible among cystic fibrosis (CF)-patients and displayed the  
210 potential to cause severe infections even in non-CF human hosts [45, 46]. *P. aeruginosa* K34-  
211 7 belongs to sequence type 233 (ST233) and is an XDR, carbapenem-resistant clinical isolate  
212 expressing the Verona integron-encoded metallo- $\beta$ -lactamase (VIM-2) [35].

213         The *P. aeruginosa* DMC30b belongs to ST244 according to Achtman’s MLST scheme  
214 for *P. aeruginosa*. To determine the genomic epidemiological characteristics of *P. aeruginosa*  
215 strain DMC30b in a global context, the phylogenetic relationships between *P. aeruginosa*  
216 DMC30b and a total of 166 other ST244 *P. aeruginosa* strains currently deposited in the NCBI  
217 GenBank database were analysed (Fig. 3). cgMLST analyses revealed that the closest relatives  
218 of *P. aeruginosa* DMC30b genome were one carbapenem-resistant ST244 *P. aeruginosa* clone  
219 in burn patients in Yunnan province, China [17], and another ST244 strain, *P. aeruginosa*  
220 MRSN 17623, clinical isolate carrying the blaVIM-6 gene recovered from human in the USA  
221 (<https://www.pseudomonas.com/strain/show/2623>) which differed by 285 cgMLST loci (Fig.  
222 3). For the first time, ST244 is reported emerging in burn patients which exhibited a higher  
223 level of resistance to several antibiotics. The obtained results highlight the need to surveillance  
224 MDR-resistant isolates in burn patients [17, 47]. Epidemiological source tracking revealed that  
225 the *P. aeruginosa* DMC30b strain has close evolutionary relationship with many strains of *P.*  
226 *aeruginosa* originating from a wide arsenal of clinical samples including enteritis,

227 gastroenteritis (diarrheal diseases), urinary tract infections, and both community- and hospital-  
228 acquired bacteraemia in humans and animals (e.g., dog). Therefore, *P. aeruginosa* DMC30b  
229 may represent a zoonotic threat either by causing disease in human hosts or animal hosts via  
230 horizontal gene transfer of plasmid-linked ARGs and/or VFGs to commensal strains.

231 The genome of the *P. aeruginosa* DMC30b possessed two plasmids namely IncP-6  
232 plasmid p10265-KPC and ColRNAI\_pkOIISD1 (Fig. 4). Of them, the IncP-6 plasmid p10265-  
233 KPC plasmid was 78,007 bp in size with an average G + C content of 65.7% and 97.59%  
234 identity (Fig. 4A) whereas ColRNAI\_pkOIISD1 was 9,359 bp in size and showed an identity  
235 of 91.35% (Fig. 4B). The IncP-6 plasmid p10265-KPC harboured numerous (> 100) predicted  
236 open-reading frames (ORFs) and seven restriction sites for different enzymes with coding  
237 sequences (CDSs) (Fig. 4A). BLAST comparison showed that IncP-6 plasmid p10265-KPC of  
238 *P. aeruginosa* DMC30b displayed 100% query coverage and 99.60% nucleotide similarity with  
239 virulent plasmid p10265-KPC (virulence plasmid of *P. aeruginosa*) isolated in January 2016  
240 from human, China (accession number: KU578314). The plasmid IncP-6 plasmid p10265-KPC  
241 is a novel IncP-6 resistance plasmid in the genome of *P. aeruginosa* DMC30b, and carries the  
242 IncP-6-type replication, partition and mobilization systems. These results corroborated with  
243 previously published results of *P. aeruginosa* strain 10265, recovered from a patient with  
244 pneumonia in a public hospital in China [16].

245 *P. aeruginosa* DMC30b was resistant to 18 antibiotics, with imipenem and meropenem  
246 MIC<sub>90s</sub> of >512 mg/L. The *P. aeruginosa* DMC30b was also positive for blaOXA-48 gene.  
247 The resistomes of *P. aeruginosa* DMC30b genome consisted of 35 genes (ARGs) conferring  
248 for resistance to aminoglycosides (aadA1 and aph(3')-IIb), four classes of  $\beta$ -lactams (OXA-10,  
249 OXA-396, OXA-847, blaPAO, blaPME-1, TEM-116), phenicol (catB7), quinolones (crpP),  
250 fluoroquinolones (gyrA), fosfomycin (fosA), sulphonamide (sul1), tetracycline (tetD, tetG),  
251 bicyclomycin (bcr1), polymyxin (arnA), and colistin (cprR) (Fig. 5). The efflux pump

252 conferring resistance to multiple antibiotics was found as the predominating resistance class in  
253 the genome of *P. aeruginosa* DMC30b. For instance, MexAB-OprM, MexCD-OprJ, MexEST-  
254 OprN, MexPQ-OpmE, MexIH-OpmD are the leading efflux pump systems conferring  
255 resistance to *P. aeruginosa* DMC30b (Fig. 5).

256 Therefore, according to this study the existence of resistomes (ARGs) and related  
257 resistance mechanisms in *P. aeruginosa* DMC30b, along with four classes of beta-lactam genes  
258 and efflux pump systems, may contribute to its extensive resistance to almost all antibiotics  
259 used for treatment purposes and can cause its emergence as a pandrug-resistant bacterium in  
260 Bangladesh. *P. aeruginosa* DMC30b is a particularly pernicious pathogen as it possesses  
261 several innate defense mechanisms against antibiotics. These results are in line with our  
262 previous findings of *P. aeruginosa* DMC-27b , where the co-existence and chromosomal  
263 inheritance of all four b-lactamase classes and acquisition of multiple resistance determinants  
264 were reported [8]. This bacterium can readily acquire genetically encoded resistance  
265 determinants from other pathogens, further increasing resistance [10, 48]. Clinically significant  
266 *P. aeruginosa* strains express resistance to various antimicrobial agents including  $\beta$ -lactam  
267 antibiotics through these efflux pump systems [49]. The intrinsic and acquired resistance  
268 mechanisms include tripartite efflux systems such as MexAB-OprM, MexCD-OprJ, MexEF-  
269 OprN and MexXY/OprM [49, 50] leading to extrusion of antimicrobial agents and other  
270 xenobiotics from the cell interior. MexAB-OprM plays a role in the intrinsic resistance of *P.*  
271 *aeruginosa* to most  $\beta$ -lactams, quinolones and many other structurally unrelated antimicrobial  
272 agents [49, 50]. Likewise, MexEF-OprN is capable of extruding quinolones [51], and MexXY-  
273 OprM expels aminoglycosides and cephalosporin [49, 52] from bacterial cell interior.  
274 Furthermore, *P. aeruginosa* achieves high-level (MIC > 1 mg/ml) triclosan resistance either by  
275 constitutive expression of triABC, an efflux pump of the resistance nodulation cell division  
276 (RND) family, or expression of MexCD-OprJ, MexEF-OprN, and MexJK-OpmH in regulatory

277 mutants, supporting the notion that efflux is the primary mechanism responsible for this  
278 bacterium's high intrinsic and acquired triclosan resistance [53]. Moreover, a series of previous  
279 studies reported that most of the ST244 isolates (85.3 %) exhibited a MDR phenotype, i.e.  
280 being resistant to carbapenems, aminoglycosides and fluoroquinolones [17, 47].

281         The genome of *P. aeruginosa* DMC30b harboured 214 VFGs with > 99.0% nucleotide  
282 similarity. Of the detected VFGs, genes associated with type III (T3SS) and type VI secretion  
283 systems (T6SS), flagella and type IV pili, pyoverdine biosynthesis proteins, flagellar/twitching  
284 motility proteins, *Pseudomonas* protein phosphatases (PppA and PppB), two-component  
285 regulatory system, transcriptional regulators (TRs), phenazine-modifying enzyme, LasA  
286 protease precursor etc. To establish infections, *P. aeruginosa* employs a broad arsenal of  
287 virulence determinants, of which its T3SS and T6SS have been the focus of much recent  
288 attention [54, 55]. *P. aeruginosa* utilizes T3SS and T6SS apparatuses to inject effector proteins  
289 from the its cytosol to the extracellular environment of the host cells to develop acute infections  
290 [55, 56]. Pyoverdine, a siderophore produced by *P. aeruginosa*, is essential for pathogenesis in  
291 mammalian infections [57], and could represent a novel drug or vaccine target. One of the  
292 principle regulatory mechanisms for *P. aeruginosa*'s virulence is the iron-scavenging  
293 siderophore pyoverdine, as it governs in-host acquisition of iron, promotes expression of  
294 multiple virulence factors, and is directly toxic [48]. Bacterial twitching motility is a surface-  
295 associated movement commonly used by Gram-negative bacteria driven by several associated  
296 protein functions [58]. Twitching motility, a pilus-mediated form of bacterial surface  
297 movement, is required for *P. aeruginosa* virulence in keratitis [59]. Moreover, twitching  
298 activity of *P. aeruginosa* play a role not only in motility but also in cell–cell adhesion, cell-  
299 surface adhesion and horizontal gene transfer in the pathogenesis of different diseases [60].  
300 The protein phosphatases (PppA and PppB) regulate the basic cellular processes and virulence  
301 in *P. aeruginosa* [61]. It has been reported that efflux pumps regulated by two-component

302 systems in several pathogens, including *P. aeruginosa*, provide multidrug resistance, which  
303 may limit the treatment options [42, 62]. *P. aeruginosa* encodes a large set of TRs that modulate  
304 and manage cellular metabolism to survive in variable environmental conditions including that  
305 of the human body, and control the expression of quorum sensing and protein secretion systems  
306 [55]. To date, several virulence-related TFs of *P. aeruginosa* have been studied individually,  
307 however, little is known about the crosstalk between strictly virulence-related TFs in this  
308 bacterial species. Phenazines can modify cellular redox states, regulate patterns of gene  
309 expression, enhance survival, contribute to competitiveness, biofilm formation, and virulence  
310 in the opportunistic pathogen *P. aeruginosa* [63]. LasA is staphylolytic proteinase which is  
311 secreted by the opportunistic pathogen *P. aeruginosa*. LasA protease play a major role in the  
312 colonization of the bacteria during bacterial keratitis by preventing other bacteria from  
313 colonization to the cornea, for example in the mixed infection with *S. aureus* the enzyme  
314 eradicate the bacteria by lysis it and finally eliminate the competitive bacteria for *P. aeruginosa*  
315 [64, 65].

316         The RAST server-based annotation of the *P. aeruginosa* DMC30b genome resulted in  
317 a total of 340 subsystems with 26% subsystem coverage (Fig. 6). The SEED functional  
318 category distribution of the genes assigned to different subsystems indicated the highest genes  
319 encoding for metabolism of amino acids and derivatives (506 genes), followed by the  
320 metabolism of carbohydrates (287 genes), protein metabolism (223 genes), cofactors, vitamins,  
321 prosthetic group, and pigments (202 genes), metabolism of aromatic compounds (123 genes),  
322 DNA metabolism (103 genes) and fatty acids, lipids, and isoprenoids (97 genes). RAST based  
323 annotation classified 182 genes in the subsystem category ‘membrane transport’, 124 genes in  
324 subsystem category ‘respiration’ and 108 genes in subsystem category ‘stress response’ (Fig.  
325 6). Further analysis of the genes in the stress response subsystem category revealed the  
326 presence of genes associated with oxidative stress (~ 60%), osmotic stress (12.0%) and

327 periplasmic stress (~ 6%). The *P. aeruginosa* DMC30b genome also encodes for 69 genes for  
328 virulence, disease and defense in the subsystem analysis (Fig. 6), of which 52 (75.36%) genes  
329 were associated with resistance to antibiotics and toxic compounds, 14 (20.29%) genes for  
330 invasion and intracellular resistance, and 3 (4.34%) genes for antibacterial peptides.

331 We found genes and proteins from the complete genome analysis of *P. aeruginosa*  
332 DMC30b attributable to different subsystem metabolic functions which corroborated with  
333 several previous studies [17, 54, 66]. Our analysis provides an important expansion of  
334 metabolic functional genes and/or pathways integral to the development of infection by *P.*  
335 *aeruginosa*. The existence of multiple *P. aeruginosa* virulence factors and their direct  
336 metabolic regulators are linked to pathogenicity. Estimating the percentage of the core  
337 metabolism genes participating in the virulence of *P. aeruginosa* DMC30b, we found that  
338 genes associated with metabolism are correlated with pathogenicity. Virulence-linked  
339 pathways in opportunistic pathogens are putative therapeutic targets that may be associated  
340 with less potential for resistance than targets in growth-essential pathways [17, 66]. However,  
341 efficacy of virulence-linked targets may be affected by the contribution of virulence-related  
342 genes to metabolism [66]. Furthermore, given its capacity to metabolize a wide variety of  
343 substrates, it is also possible that *P. aeruginosa* DMC30b possesses greater potential for  
344 enzymatic modification, virulence and MDR mechanisms. Therefore, the metabolic diversity,  
345 transport capabilities and regulatory adaptability that enable *P. aeruginosa* DMC30b to thrive  
346 and compete with other microorganisms probably all contribute to its high intrinsic resistance  
347 to antibiotics. Knowledge of the complete genome sequence and encoded processes (ARGs,  
348 VFGs and subsystems) provides a wealth of information for the discovery and exploitation of  
349 new antibiotic targets, and hope for the development of more effective strategies to treat the  
350 life-threatening opportunistic infections caused by *P. aeruginosa* in humans.

351 In summary, this is the first WGS-based study on MDR *P. aeruginosa* DMC30b  
352 isolated from septic wound swab of a severely affected burn patient in Bangladesh. In this  
353 study, we report the genomic characteristics of a MDR *P. aeruginosa* DMC30b carrying  
354 different ARGs, VFGs and genomic functional potentials which may help to elucidate the  
355 dissemination mechanisms of resistance and virulent genes among bacteria, animals, and  
356 humans. These data can facilitate unravelling the genomic features, antimicrobial resistance  
357 mechanisms and epidemiological characteristics of this bacterial pathogen in the future. Further  
358 studies are required to have a wider understanding of genetic features of *P. aeruginosa* isolates  
359 circulating within communities in Bangladesh. This could ultimately bring about informed  
360 government policy and adequate community awareness toward curbing the transmission and  
361 continuous emergence of such dangerous pathogens.

#### 362 **4. Data availability**

363 The WGS data of the *P. aeruginosa* DMC30b is deposited at DDBJ/ENA/GenBank  
364 under accession number JAMQYG000000000 (BioSample SAMN28906490), and the  
365 assembly reports of the genome are also available at GenBank  
366 (<https://ncbi.nlm.nih.gov/nuccore/JAMQYG000000000>). The version described in this paper  
367 is version JAMQYG000000000.1. The Ion Torrent FASTQ reads are available in the National  
368 Center for Biotechnology Information (NCBI) under BioProject accession number  
369 PRJNA846956.

370

371

372

#### **Figures and Table with caption**

373

374



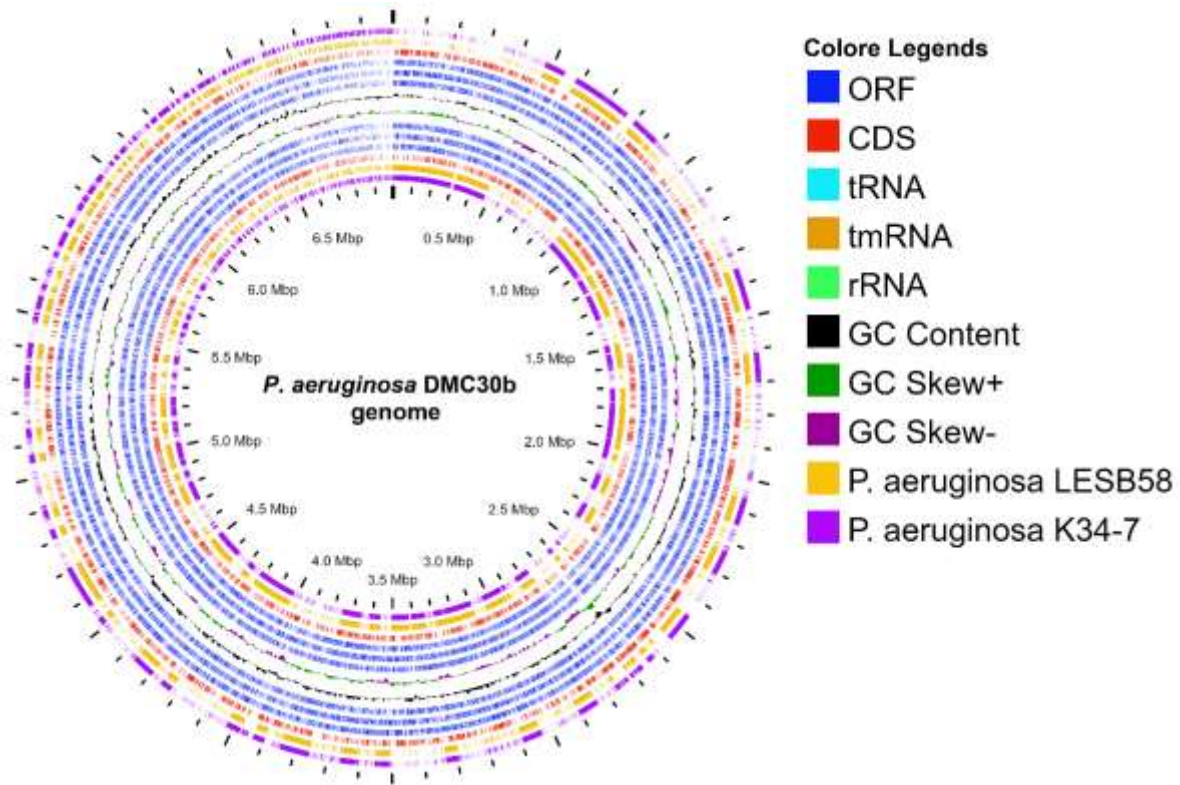

375

376 **Fig. 1.** Circular genome representation of *P. aeruginosa* strain DMC30b compared with *P.*  
377 *aeruginosa* LESB58 (GCA\_000026645.1) and *P. aeruginosa* K34-7 (NZ\_CP029707). The six  
378 innermost layers in the graphic portray the genome coordinates (mega base pairs—Mbp,  
379 purple), coding sequences (CDS; red), open reading frames (ORF, blue), GC content (zigzag  
380 black line) and GC skew (green + /deep purple – zigzag) of the *P. aeruginosa* strain DMC30b  
381 genome. The other colored rings, from the outermost to innermost, depict the nucleotide  
382 BLAST alignment of *P. aeruginosa* K34-7 (purple) followed by *P. aeruginosa* LESB58  
383 (yellow) representing the positions covered by G+C content (Black), G+C positive skew  
384 (green), and G+C negative skew (deep purple). Image created using CGview Server.

385

386



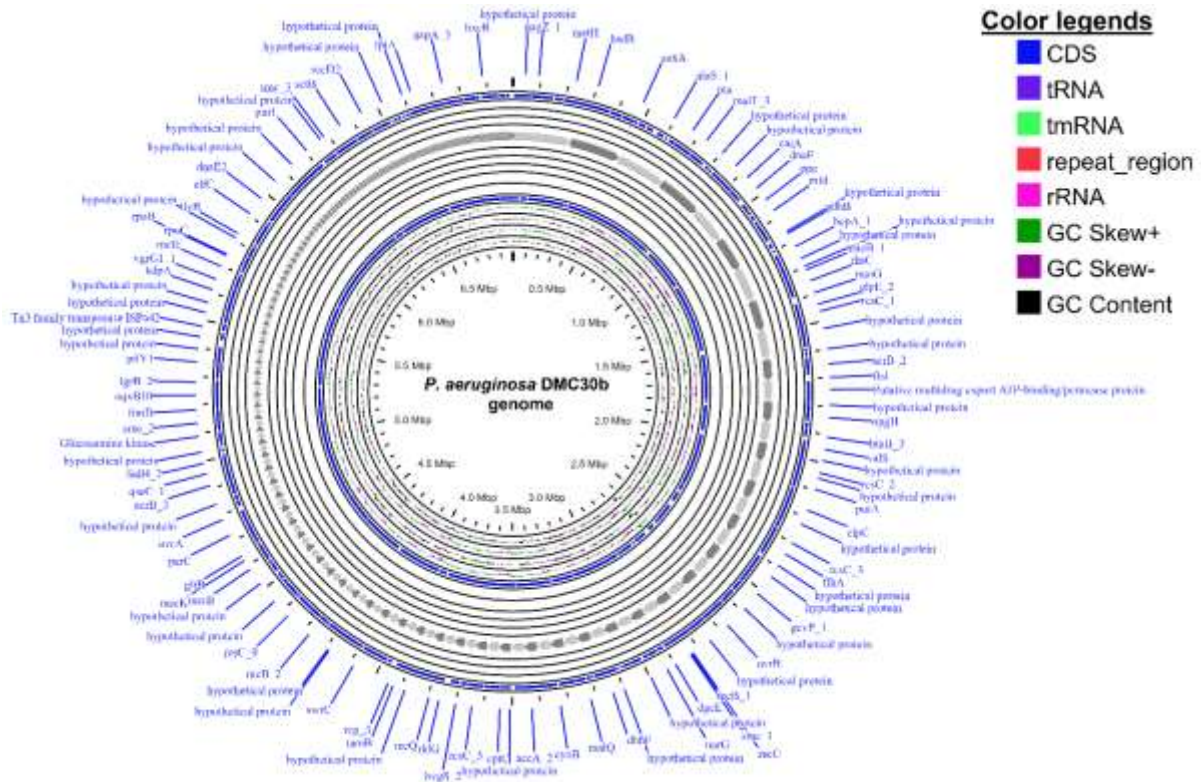

387

388 **Fig. 2.** Circular representation of genome *P. aeruginosa* strain DMC30b using CGView Server

389 (<http://cgview.ca>). The contents are arranged in feature rings (starting with outermost ring): the

390 outermost first ring shows the CDS (coding sequences) with Prokka annotation (both strands

391 combined); tRNA, tmRNA, repeat region and rRNA are indicated; the third ring displays the

392 G+C content; the fourth ring shows the G/C skew information in the (+) strand (green color)

393 and (-) strand (dark pink color).

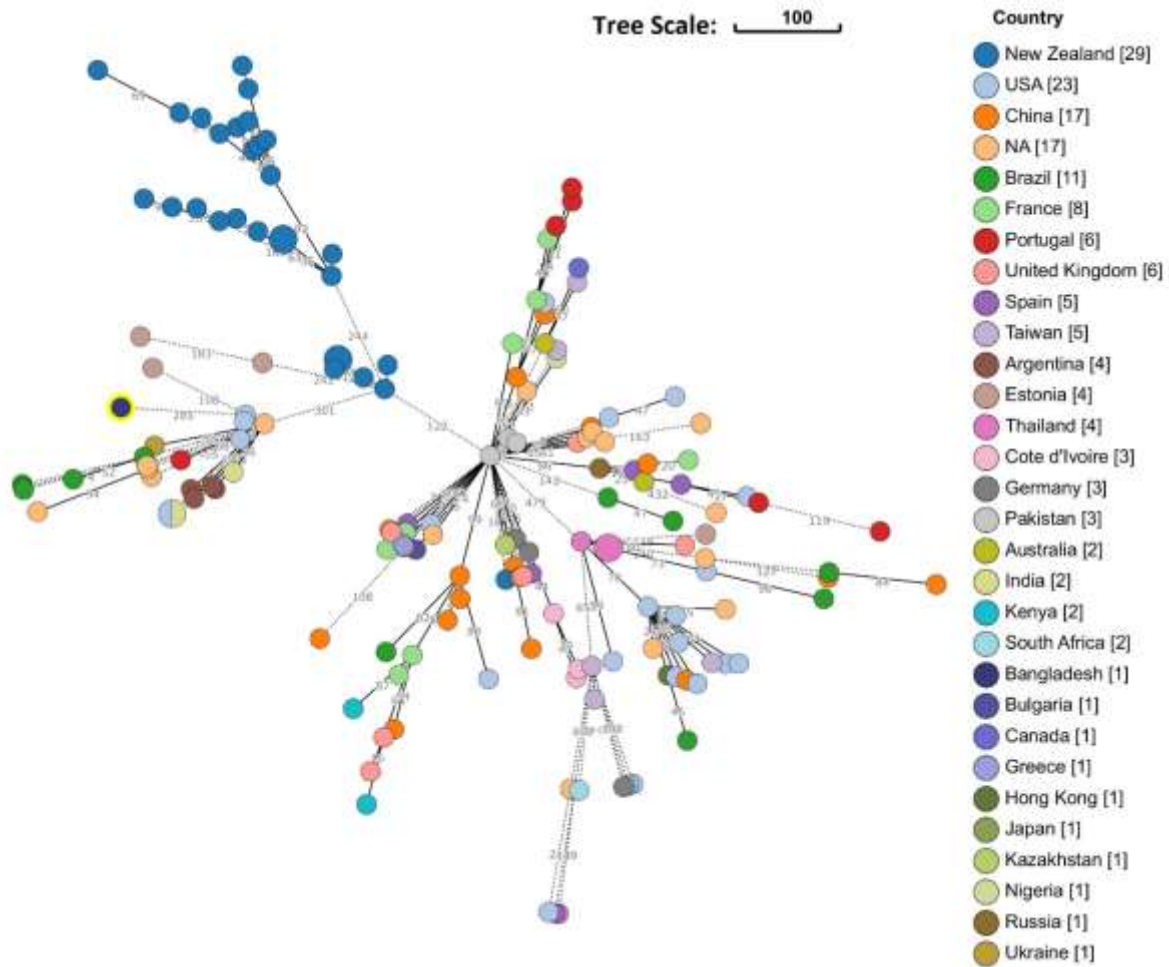

394

395 **Fig. 3.** Phylogenetic relationship between *P. aeruginosa* strain DMC30b and all of the 166 *P.*  
396 *aeruginosa* strains belonging to ST244 currently available in the NCBI GenBank database by  
397 core genome multilocus sequence typing (cgMLST) analysis.

398

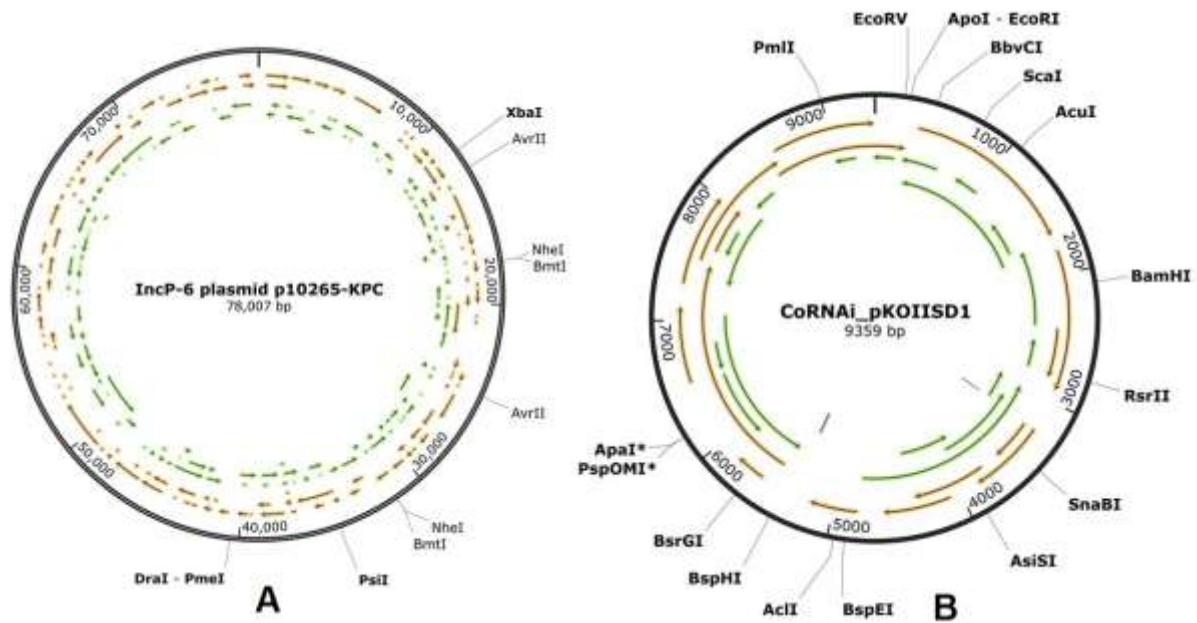

399

400 **Fig. 4.** Genetic information surrounding on IncP-6 plasmid p10265-KPC and  
401 ColRNAi\_pKOIISD1 plasmid of the *P. aeruginosa* DMC30b strain. The arrows denote the  
402 open-reading frames (ORFs) and restriction sites for different enzymes with coding sequences  
403 (CDSs).

404

405

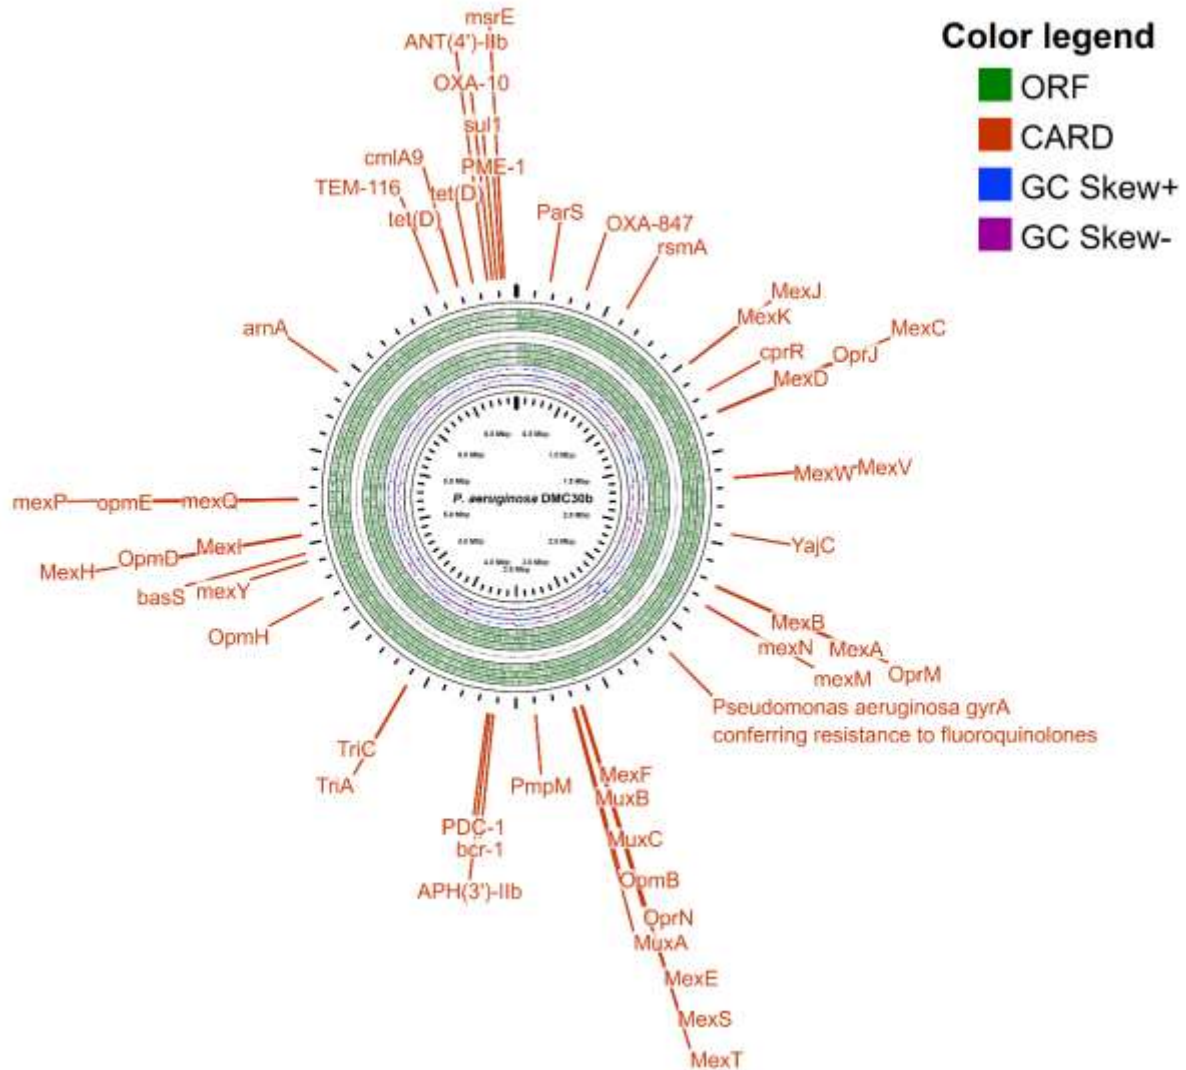

406

407 **Fig. 5.** Circular representation of genome *P. aeruginosa* strain DMC30b using CGView Server  
408 (<http://cgview.ca>). The green layer represents the ORF (open reading frame) while GC skew +  
409 and GC skew - are depicted by the blue and purple layers, respectively. The outermost layer  
410 (black colour coordinates) of the circular graphic shows the antimicrobial resistances genes  
411 and related pathways (deep orange) found in the genome through CARD (Comprehensive  
412 Antibiotic Resistance Database).

413

414

415

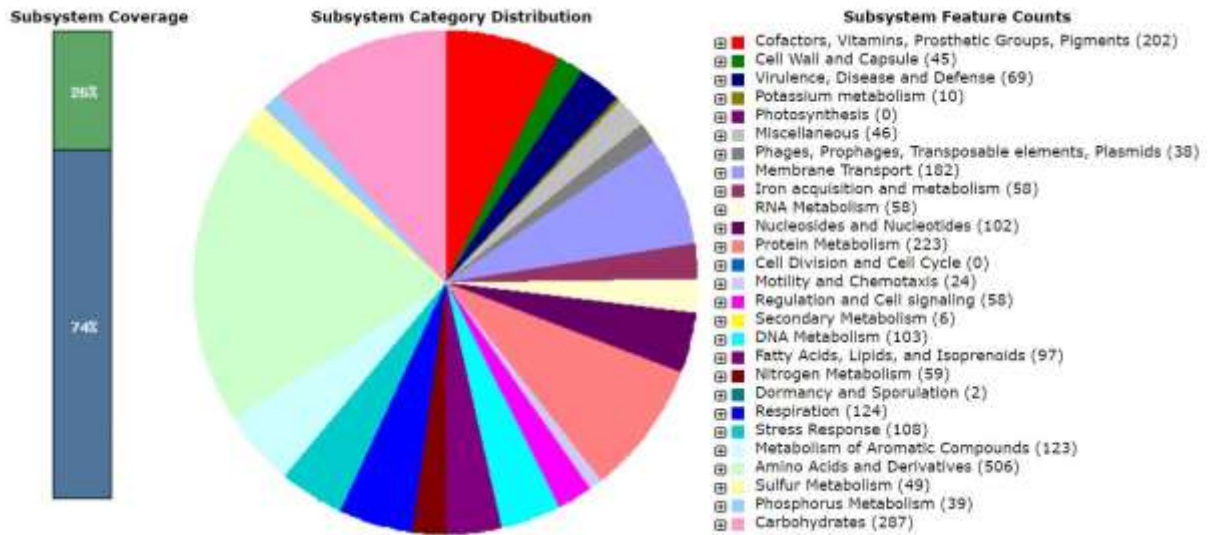

416

417 **Fig. 6.** An overview of the subsystem categories assigned to the genes predicted in the genome

418 of *P. aeruginosa* strain DMC30b. The whole-genome sequence of the strain DMC30b was

419 annotated using the RAST server.

420

421

422

423

424

425

426

427

428

429

430



431 **Table 1.** *Pseudomonas aeruginosa* strain DMC30b genome characteristics.

| <b>Attribute(s)</b>               | <b>Value</b> | <b>% of Total<sup>a</sup></b> |
|-----------------------------------|--------------|-------------------------------|
| Genome size (bp)                  | 6,994,756    | 100.00                        |
| DNA coding (bp)                   | 6,470,148    | 92.50                         |
| Number of reads assembles         | 2,550,071    | 100                           |
| Genome coverage                   | 76.76x       | 76.76                         |
| DNA G + C (bp)                    | 4,595,555    | 65.7                          |
| Total contigs                     | 474          |                               |
| Longest contig size (bp)          | 252,681      | 3.61                          |
| Shortest contig size (bp)         | 202          | 0.002                         |
| Contig N50 (bp)                   | 56,583       | 0.81                          |
| Contig L50 (bp)                   | 35           |                               |
| Total genes                       | 7,036        | 100.00                        |
| Coding sequences (CDSs)           | 6,969        | 99.04                         |
| CDSs (Protein coding)             | 6,685        | 95.01                         |
| RNA genes                         | 67           | 100                           |
| tRNA genes                        | 59           | 88                            |
| rRNA genes                        | 4            | 6                             |
| ncRNA genes                       | 4            | 6                             |
| Pseudo genes                      | 285          | 4.05                          |
| Genes with function prediction    | 7,146        | 100                           |
| Genes assigned to SEED subsystems | 1856         | 26                            |
| Number of subsystems              | 340          |                               |
| CRISPR arrays                     | 2            |                               |
| Number of plasmids                | 2            |                               |

432 <sup>a</sup>Total based on either the size of the genome in base pairs (bp) or the total number of genes in the annotated  
433 genome.

434

435

436

437

438

439

440

441

442

443

444

445

446

447 **Acknowledgments**

448       The authors would like extend their gratitude to TWAS (The World Academy of Science) for  
449 funding research grants to complete the study. We, also would like to thank Sumaiya Sharmin (Lecturer,  
450 Primeasia University, Bangladesh) for her assistance in collecting the study isolates from Dhaka  
451 Medical College (DMC) Hospital, Bangladesh. Our sincere gratitude to Dr. Zhi Ruan (Sir Run Run  
452 Shaw Hospital, Zhejiang University School of Medicine, Hangzhou 310016, China) for his technical  
453 support in BacWGSTdb 2.0 analysis of the genome.

454 **Funding**

455       This research project was funded by the TWAS (The World Academy of Science) under Grant  
456 NO 15-123 RG/BIO/AS\_I.

457 **Conflict of interest**

458       None declared.

459

460

461

462

463

464

465

466

467

468

## 469 References

- 470 1. Heimesaat, M.M., et al., *Multidrug-resistant Pseudomonas aeruginosa accelerate intestinal,*  
471 *extra-intestinal, and systemic inflammatory responses in human microbiota-associated mice*  
472 *with subacute ileitis.* *Frontiers in immunology*, 2019. **10**: p. 49.
- 473 2. Rada, A.M., et al., *Genetic Diversity of Multidrug-Resistant Pseudomonas aeruginosa Isolates*  
474 *Carrying blaVIM-2 and blaKPC-2 Genes That Spread on Different Genetic Environment in*  
475 *Colombia.* *Frontiers in microbiology*, 2021: p. 2251.
- 476 3. Caldwell, M.D., *Bacteria and antibiotics in wound healing.* *Surgical Clinics*, 2020. **100**(4): p.  
477 757-776.
- 478 4. Wolcott, R.D., et al., *Analysis of the chronic wound microbiota of 2,963 patients by 16S rDNA*  
479 *pyrosequencing.* *Wound repair and regeneration*, 2016. **24**(1): p. 163-174.
- 480 5. Raizman, R., W. Little, and A.C. Smith, *Rapid diagnosis of Pseudomonas aeruginosa in wounds*  
481 *with point-of-care fluorescence imaging.* *Diagnostics*, 2021. **11**(2): p. 280.
- 482 6. Serra, R., et al., *Chronic wound infections: the role of Pseudomonas aeruginosa and*  
483 *Staphylococcus aureus.* *Expert review of anti-infective therapy*, 2015. **13**(5): p. 605-613.
- 484 7. Fleming, D., et al., *Contribution of Pseudomonas aeruginosa Exopolysaccharides Pel and Psl to*  
485 *Wound Infections.* *Frontiers in Cellular and Infection Microbiology*, 2022: p. 323.
- 486 8. Jahan, M.I., et al., *Occurrence of intI1-associated VIM-5 carbapenemase and co-existence of*  
487 *all four classes of  $\beta$ -lactamase in carbapenem-resistant clinical Pseudomonas aeruginosa*  
488 *DMC-27b.* *Journal of Antimicrobial Chemotherapy*, 2020. **75**(1): p. 86-91.
- 489 9. Rakhi, N.N., et al., *Diversity of carbapenemases in clinical isolates: The emergence of blaVIM-*  
490 *5 in Bangladesh.* *Journal of Infection and Chemotherapy*, 2019. **25**(6): p. 444-451.
- 491 10. Singh, S., et al., *Complete genome sequence of an extensively drug-resistant Pseudomonas*  
492 *aeruginosa ST773 clinical isolate from North India.* *Journal of Global Antimicrobial Resistance*,  
493 2021. **27**: p. 244-246.
- 494 11. Control, C.f.D. and Prevention, *Antibiotic resistance threats in the United States, 2019.* 2019:  
495 US Department of Health and Human Services, Centres for Disease Control and ...
- 496 12. Asokan, G.V. and A. Vanitha, *WHO global priority pathogens list on antibiotic resistance: an*  
497 *urgent need for action to integrate One Health data.* *Perspectives in public health*, 2018.  
498 **138**(2): p. 87-88.
- 499 13. Rojas, L.J., et al., *Genomic heterogeneity underlies multidrug resistance in Pseudomonas*  
500 *aeruginosa: A population-level analysis beyond susceptibility testing.* *PloS one*, 2022. **17**(3): p.  
501 e0265129.
- 502 14. Horcajada, J.P., et al., *Epidemiology and treatment of multidrug-resistant and extensively*  
503 *drug-resistant Pseudomonas aeruginosa infections.* *Clinical microbiology reviews*, 2019. **32**(4):  
504 p. e00031-19.
- 505 15. Abril, D., et al., *Genome plasticity favours double chromosomal Tn4401b-blaKPC-2 transposon*  
506 *insertion in the Pseudomonas aeruginosa ST235 clone.* *BMC microbiology*, 2019. **19**(1): p. 1-  
507 12.
- 508 16. Dai, X., et al., *The IncP-6 plasmid p10265-KPC from Pseudomonas aeruginosa carries a novel*  
509  *$\Delta$ ISEc33-associated blaKPC-2 gene cluster.* *Frontiers in microbiology*, 2016. **7**: p. 310.
- 510 17. Fang, Y., et al., *Emergence of Carbapenem-Resistant ST244, ST292, and ST2446 Pseudomonas*  
511 *aeruginosa Clones in Burn Patients in Yunnan Province.* *Infection and Drug Resistance*, 2022.  
512 **15**: p. 1103.
- 513 18. Peña, C., et al., *Influence of virulence genotype and resistance profile in the mortality of*  
514 *Pseudomonas aeruginosa bloodstream infections.* *Clinical Infectious Diseases*, 2015. **60**(4): p.  
515 539-548.
- 516 19. Sader, H.S., et al., *Antimicrobial susceptibility of Enterobacteriaceae and Pseudomonas*  
517 *aeruginosa isolates from United States medical centers stratified by infection type: results*  
518 *from the International Network for Optimal Resistance Monitoring (INFORM) surveillance*  
519 *program, 2015–2016.* *Diagnostic microbiology and infectious disease*, 2018. **92**(1): p. 69-74.



- 520 20. Pappa, O., et al., *Molecular characterization and phylogenetic analysis of Pseudomonas*  
521 *aeruginosa* isolates recovered from Greek aquatic habitats implementing the Double-Locus  
522 *Sequence Typing Scheme*. Microbial ecology, 2017. **74**(1): p. 78-88.
- 523 21. Cholley, P., et al., *Comparison of double-locus sequence typing (DLST) and multilocus sequence*  
524 *typing (MLST) for the investigation of Pseudomonas aeruginosa populations*. Diagnostic  
525 Microbiology and Infectious Disease, 2015. **82**(4): p. 274-277.
- 526 22. Freschi, L., et al., *Genomic characterisation of an international Pseudomonas aeruginosa*  
527 *reference panel indicates that the two major groups draw upon distinct mobile gene pools*.  
528 FEMS microbiology letters, 2018. **365**(14): p. fny120.
- 529 23. Freschi, L., et al., *Clinical utilization of genomics data produced by the international*  
530 *Pseudomonas aeruginosa consortium*. Frontiers in microbiology, 2015. **6**: p. 1036.
- 531 24. Pohl, S., et al., *The extensive set of accessory Pseudomonas aeruginosa genomic components*.  
532 FEMS microbiology letters, 2014. **356**(2): p. 235-241.
- 533 25. Humphries, R., et al., *Overview of changes to the clinical and laboratory standards institute*  
534 *performance standards for antimicrobial susceptibility testing, M100*. Journal of clinical  
535 microbiology, 2021. **59**(12): p. e00213-21.
- 536 26. Saha, O., et al., *First report from Bangladesh on genetic diversity of multidrug-resistant*  
537 *Pasteurella multocida* type B: 2 in fowl cholera. Veterinary World, 2021. **14**(9): p. 2527.
- 538 27. Shankar, C., et al., *Whole genome analysis of hypervirulent Klebsiella pneumoniae isolates*  
539 *from community and hospital acquired bloodstream infection*. BMC microbiology, 2018. **18**(1):  
540 p. 1-9.
- 541 28. Brown, J., M. Pirrung, and L.A. McCue, *FQC Dashboard: integrates FastQC results into a web-*  
542 *based, interactive, and extensible FASTQ quality control tool*. Bioinformatics, 2017. **33**(19): p.  
543 3137-3139.
- 544 29. Bolger, A.M., M. Lohse, and B. Usadel, *Trimmomatic: a flexible trimmer for Illumina sequence*  
545 *data*. Bioinformatics, 2014. **30**(15): p. 2114-2120.
- 546 30. Hoque, M.N., et al., *Metagenomic deep sequencing reveals association of microbiome*  
547 *signature with functional biases in bovine mastitis*. Scientific reports, 2019. **9**(1): p. 1-14.
- 548 31. Saha, O., et al., *Genome-wide genetic marker analysis and genotyping of Escherichia fergusonii*  
549 *strain OTSVEF-60*. Brazilian Journal of Microbiology, 2021. **52**(2): p. 989-1004.
- 550 32. Prjibelski, A., et al., *Using SPAdes de novo assembler*. Current protocols in bioinformatics,  
551 2020. **70**(1): p. e102.
- 552 33. Grant, J.R. and P. Stothard, *The CGView Server: a comparative genomics tool for circular*  
553 *genomes*. Nucleic acids research, 2008. **36**(suppl\_2): p. W181-W184.
- 554 34. Subedi, D., et al., *Comparative genomics of clinical strains of Pseudomonas aeruginosa strains*  
555 *isolated from different geographic sites*. Scientific reports, 2018. **8**(1): p. 1-14.
- 556 35. Taiaroa, G., et al., *Complete genome sequence of pseudomonas aeruginosa K34-7, a*  
557 *carbapenem-resistant isolate of the high-risk sequence type 233*. Microbiology Resource  
558 Announcements, 2018. **7**(4): p. e00886-18.
- 559 36. Thomsen, M.C.F., et al., *A bacterial analysis platform: an integrated system for analysing*  
560 *bacterial whole genome sequencing data for clinical diagnostics and surveillance*. PloS one,  
561 2016. **11**(6): p. e0157718.
- 562 37. Cosentino, S., et al., *PathogenFinder-distinguishing friend from foe using bacterial whole*  
563 *genome sequence data*. PloS one, 2013. **8**(10): p. e77302.
- 564 38. Seemann, T., *Prokka: rapid prokaryotic genome annotation*. Bioinformatics, 2014. **30**(14): p.  
565 2068-2069.
- 566 39. Feng, Y., et al., *BacWGSTdb 2.0: a one-stop repository for bacterial whole-genome sequence*  
567 *typing and source tracking*. Nucleic Acids Research, 2021. **49**(D1): p. D644-D650.
- 568 40. Alcock, B.P., et al., *CARD 2020: antibiotic resistome surveillance with the comprehensive*  
569 *antibiotic resistance database*. Nucleic acids research, 2020. **48**(D1): p. D517-D525.

- 570 41. Kleinheinz, K.A., K.G. Joensen, and M.V. Larsen, *Applying the ResFinder and VirulenceFinder*  
571 *web-services for easy identification of acquired antibiotic resistance and E. coli virulence genes*  
572 *in bacteriophage and prophage nucleotide sequences*. Bacteriophage, 2014. **4**(2): p. e27943.
- 573 42. Hoque, M.N., et al., *Microbiome dynamics and genomic determinants of bovine mastitis*.  
574 *Genomics*, 2020. **112**(6): p. 5188-5203.
- 575 43. Aziz, R.K., et al., *The RAST Server: rapid annotations using subsystems technology*. BMC  
576 *genomics*, 2008. **9**(1): p. 1-15.
- 577 44. Stover, C.K., et al., *Complete genome sequence of Pseudomonas aeruginosa PAO1, an*  
578 *opportunistic pathogen*. Nature, 2000. **406**(6799): p. 959-964.
- 579 45. McCallum, S., et al., *Spread of an epidemic Pseudomonas aeruginosa strain from a patient*  
580 *with cystic fibrosis (CF) to non-CF relatives*. Thorax, 2002. **57**(6): p. 559-560.
- 581 46. Klockgether, J., et al., *Pseudomonas aeruginosa genomic structure and diversity*. Frontiers in  
582 *microbiology*, 2011. **2**: p. 150.
- 583 47. Chen, Y., et al., *Dissemination of IMP-6-producing Pseudomonas aeruginosa ST244 in multiple*  
584 *cities in China*. European journal of clinical microbiology & infectious diseases, 2014. **33**(7): p.  
585 1181-1187.
- 586 48. Kirienko, D.R., D. Kang, and N.V. Kirienko, *Novel pyoverdine inhibitors mitigate Pseudomonas*  
587 *aeruginosa pathogenesis*. Frontiers in microbiology, 2019. **9**: p. 3317.
- 588 49. Pang, Z., et al., *Antibiotic resistance in Pseudomonas aeruginosa: mechanisms and alternative*  
589 *therapeutic strategies*. Biotechnology advances, 2019. **37**(1): p. 177-192.
- 590 50. Okamoto, K., N. Gotoh, and T. Nishino, *Pseudomonas aeruginosa reveals high intrinsic*  
591 *resistance to penem antibiotics: penem resistance mechanisms and their interplay*.  
592 *Antimicrobial agents and chemotherapy*, 2001. **45**(7): p. 1964-1971.
- 593 51. Llanes, C., et al., *Role of the MexEF-OprN efflux system in low-level resistance of Pseudomonas*  
594 *aeruginosa to ciprofloxacin*. Antimicrobial agents and chemotherapy, 2011. **55**(12): p. 5676-  
595 5684.
- 596 52. Hocquet, D., et al., *Involvement of the MexXY-OprM efflux system in emergence of cefepime*  
597 *resistance in clinical strains of Pseudomonas aeruginosa*. Antimicrobial agents and  
598 *chemotherapy*, 2006. **50**(4): p. 1347-1351.
- 599 53. Mima, T., et al., *Identification and characterization of TriABC-OpmH, a triclosan efflux pump*  
600 *of Pseudomonas aeruginosa requiring two membrane fusion proteins*. Journal of bacteriology,  
601 2007. **189**(21): p. 7600-7609.
- 602 54. Hauser, A.R., *The type III secretion system of Pseudomonas aeruginosa: infection by injection*.  
603 *Nature Reviews Microbiology*, 2009. **7**(9): p. 654-665.
- 604 55. Huang, H., et al., *An integrated genomic regulatory network of virulence-related*  
605 *transcriptional factors in Pseudomonas aeruginosa*. Nature communications, 2019. **10**(1): p.  
606 1-13.
- 607 56. Zhu, M., et al., *Modulation of type III secretion system in Pseudomonas aeruginosa:*  
608 *involvement of the PA4857 gene product*. Frontiers in microbiology, 2016. **7**: p. 7.
- 609 57. Kang, D., et al., *Pyoverdine, a siderophore from Pseudomonas aeruginosa, translocates into C.*  
610 *elegans, removes iron, and activates a distinct host response*. Virulence, 2018. **9**(1): p. 804-  
611 817.
- 612 58. Li, J., et al., *DMBT1 inhibition of Pseudomonas aeruginosa twitching motility involves its N-*  
613 *glycosylation and cannot be conferred by the Scavenger Receptor Cysteine-Rich bacteria-*  
614 *binding peptide domain*. Scientific Reports, 2019. **9**(1): p. 1-13.
- 615 59. Alarcon, I., D.J. Evans, and S.M. Fleiszig, *The role of twitching motility in Pseudomonas*  
616 *aeruginosa exit from and translocation of corneal epithelial cells*. Investigative ophthalmology  
617 & visual science, 2009. **50**(5): p. 2237-2244.
- 618 60. Marathe, R., et al., *Bacterial twitching motility is coordinated by a two-dimensional tug-of-war*  
619 *with directional memory*. Nature communications, 2014. **5**(1): p. 1-10.

- 620 61. Sajid, A., et al., *Protein phosphatases of pathogenic bacteria: role in physiology and virulence*.  
621 *Annu Rev Microbiol*, 2015. **69**(527): p. 47.
- 622 62. Hoque, M.N., et al., *Insights into the resistome of bovine clinical mastitis microbiome, a key*  
623 *factor in disease complication*. *Frontiers in Microbiology*, 2020. **11**: p. 860.
- 624 63. Hendry, S., et al., *Functional analysis of phenazine biosynthesis genes in Burkholderia spp.*  
625 *Applied and environmental microbiology*, 2021. **87**(11): p. e02348-20.
- 626 64. Al–Abaadi, M.C., J.M. Karhoot, and S.A. Funttil, *Experimental Study the role of LasA Protease of*  
627 *Pseudomonas aeruginosa in the Treatment of Bacterial Keratitis Caused by Staphylococcus*  
628 *aureaus*. *Journal of the Faculty of Medicine Baghdad*, 2015. **57**(2): p. 164-169.
- 629 65. Grande, K.K., et al., *Identification of critical residues in the propeptide of LasA protease of*  
630 *Pseudomonas aeruginosa involved in the formation of a stable mature protease*. *Journal of*  
631 *bacteriology*, 2007. **189**(11): p. 3960-3968.
- 632 66. Bartell, J.A., et al., *Reconstruction of the metabolic network of Pseudomonas aeruginosa to*  
633 *interrogate virulence factor synthesis*. *Nature communications*, 2017. **8**(1): p. 1-13.
- 634
